# Supplementary material
Source: MDPI journal article supplement (https://www.mdpi.com/2076-3417/12/6/2837)

**Figure S1.** Sequences obtained in our study (marked as ITA-1 to ITA-5) were aligned against the reference sequence AB634837 (line 1) and those present in the NCBI database (from line 7) using Bioedt free software.

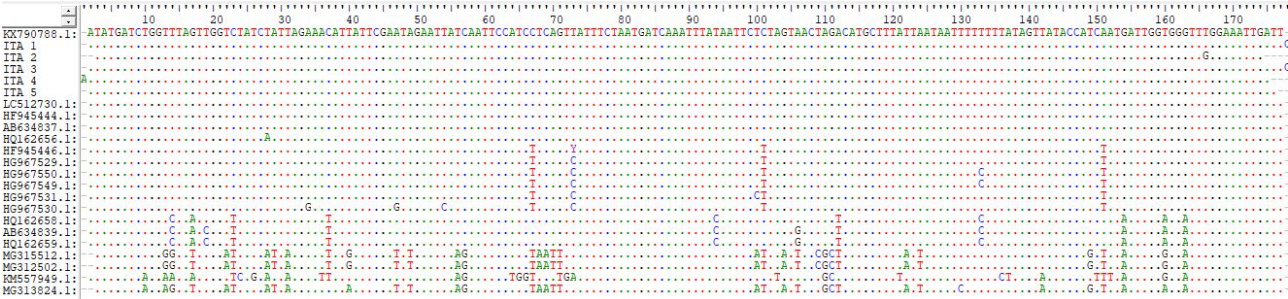

Supplement: s1 [file s1 › applsci-1603046-supplementary.pdf]
